# Supplementary material for: The Incidence and Risk Factor of Atrial Fibrillation After Percutaneous Coronary Intervention
Source: Research Square preprint supplement (doi:10.21203/rs.3.rs-6841011/v1), 2025-06-25
Supplement: Supplementary file 1 [file 3c7d1eea49d8d2fc16f9c17f.docx]

Supplementary Table 1. Baseline characteristics of participants in PSM cohort.

|  | Overall | Non-AF | New-onset AF | P |
| --- | --- | --- | --- | --- |
|  | n= 376 | n= 282 | n= 94 |
| Male (%) | 293 (77.9%) | 222 (78.7%) | 71 (75.5%) | 0.615 |
| Age，years | 59.4 ±10.2 | 58.2±10.4 | 62.9± 8.4 | <0.001 |
| BMI, kg/m2 | 25.7± 3.0 | 25.7± 3.0 | 25.6± 3.1 | 0.775 |
| Clinical history |  |  |  |  |
| Previous MI | 84 (22.3%) | 56 (19.9%) | 28 (29.8%) | 0.063 |
| Previous PCI | 90 (23.9%) | 56 (19.9%) | 34 (36.2%) | 0.002 |
| Previous CABG | 12 (3.2%) | 8 (2.8%) | 4 (4.3%) | 0.735 |
| Comorbidity |  |  |  |  |
| Hypertension | 239 (63.6%) | 174 (61.7%) | 65 (69.1%) | 0.24 |
| Hyperlipidemia | 254 (67.6%) | 192 (68.1%) | 62 (66.0%) | 0.799 |
| Diabetes | 126 (33.5%) | 95 (33.7%) | 31 (33.0%) | 1 |
| CVD | 44 (11.7%) | 31 (11.0%) | 13 (13.8%) | 0.578 |
| PAD | 37 (9.8%) | 22 (7.8%) | 15 (16.0%) | 0.036 |
| Anemia | 40 (10.6%) | 28 (9.9%) | 12 (12.8%) | 0.562 |
| COPD | 220 (58.5%) | 175 (62.1%) | 45 (47.9%) | 0.022 |
| Smoking | 239 (63.6%) | 174 (61.7%) | 65 (69.1%) | 0.24 |
| Clinical presentation |  |  |  | 0.157 |
| ACS | 235 (62.5%) | 182 (64.5%) | 53 (56.4%) |  |
| CCS | 141 (27.5%) | 100 (35.5%) | 41 (43.6%) |  |
| LVEF < 40% | 8 (2.1%) | 6 (2.1%) | 2 (2.1%) | 1 |
| Laboratory results |  |  |  |  |
| HbA1C, % | 6.7± 1.2 | 6.7± 1.1 | 6.7± 1.3 | 0.833 |
| hsCRP, mg/L | 3.0± 3.7 | 3.0± 3.7 | 3.0± 3.6 | 0.975 |
| LDL, mmol/L | 2.5± 0.9 | 2.5± 0.9 | 2.5± 1.0 | 0.944 |
| HDL, mmol/L | 1.0± 0.3 | 1.0 ± 0.3 | 1.1± 0.3 | 0.336 |
| Lpa, mg/L | 184 (83-400) | 172 (80-349) | 225 (88-554) | 0.183 |
| eGFR < 60 | 12 (3.2%) | 9 (3.2%) | 3 (3.2%) | 1 |

ACS, acute coronary syndrome; AF, atrial fibrillation; BMI, body mass index; CABG, coronary artery bypass graft; CCS, chronic coronary syndrome; COPD, chronic obstructive pulmonary disease; CVD, cerebrovascular disease; eGFR, estimated Glomerular Filtration Rate; HbA1c, glycosylated hemoglobin A1c; HDL, high density lipoprotein; hsCRP, high-sensitivity C-reactive protein; LDL, low density lipoprotein; LVEF, left ventricular ejection fraction; MI, myocardial infarction; PAD, peripheral arterial disease; PCI, percutaneous coronary intervention; PSM, propensity score matching.

Supplementary Table 2. Percutaneous coronary intervention procedure data in PSM cohort.

|  | Overall | Non-AF | New-onset AF | P |
| --- | --- | --- | --- | --- |
|  | n= 376 | n= 282 | n= 94 |
| PCI data |  |  |  |  |
| Emergency PCI | 0 | 0 | 0 | - |
| IABP | 2 (0.5%) | 2(0.7%) | 0 | 1 |
| LM stenosis | 25 (6.6%) | 17 (6.0%) | 8 (8.5%) | 0.55 |
| Multivessel disease | 269 (71.5%) | 195 (69.1%) | 74 (78.7%) | 0.099 |
| Syntax | 10 (6-17) | 10 (7-18) | 9 (5-16) | 0.156 |
| TIMI 0 before PCI | 60 (16.0%) | 47 (16.7%) | 13 (13.8%) | 0.626 |
| No. of Stents | 1(1-2) | 1(1-2) | 1(1-2) | 0.812 |
| Discharge therapy |  |  |  |  |
| DAPT | 364 (96.8%) | 273 (96.8%) | 91 (96.8%) | 1 |
| Beta-blocker | 339 (90.2%) | 257 (91.1%) | 82 (87.2%) | 0.368 |
| Statins | 367 (97.6%) | 276 (97.9%) | 91 (96.8%) | 0.846 |

AF, atrial fibrillation; DAPT, dual antiplatelet therapy; LM, left main; IABP, intra-aortic balloon pump; PCI, percutaneous coronary intervention; PSM, propensity score matching.

Supplementary Table 3. Other clinical outcomes during follow-up.

|  | Overall | Non-AF | New-onset AF | P |
| --- | --- | --- | --- | --- |
|  | n= 8367 | n= 8273 | n= 94 |
| Acute myocardial infarction (%) | 90 (1.1%) | 89 (1.1%) | 1 (1.1%) | 1 |
| Revascularization (%) | 741 (8.9%) | 738 (8.9%) | 3 (3.2%) | 0.078 |
| Death (%) | 68 (0.8%) | 68 (0.8%) | 0 (0.0%) | 0.76 |
| Stroke (%) | 122 (1.5%) | 117 (1.4%) | 5 (5.3%) | 0.007 |

Supplementary Table 4.

| Model | Variables | Points |
| --- | --- | --- |
| The POAF Score |  |  |
|  | Age 60–69 y | 1 |
|  | Age 70–79 y | 2 |
|  | Age ≥ 80 y | 2 |
|  | Chronic obstructive pulmonary disease | 1 |
|  | eGFR < 15 mL/min/1.73 m2 or dialysis | 1 |
|  | Emergency | 1 |
|  | Preoperative intra-aortic balloon pump | 1 |
|  | Left ventricular ejection fraction < 30% | 1 |
|  | Valve surgery | 1 |
| The CHA2DS2-VASc Score |  |  |
|  | Congestive heart failure/left ventricular dysfunction | 1 |
|  | Hypertension | 1 |
|  | Age ≥ 75 y | 2 |
|  | Diabetes mellitus | 1 |
|  | Stroke/transient ischemic attack/thromboembolism | 2 |
|  | Vascular disease | 1 |
|  | Age 65–74 y | 1 |
|  | Sex category (female) | 1 |
| The Atrial Fibrillation Risk Index |  |  |
|  | Age (y): males >60, females >66 | 1 |
|  | Weight (kg): males >76, females >64 | 1 |
|  | Height (cm): males >176, females >168 | 1 |
|  | Peripheral vascular disease | 1 |

eGFR, estimated glomerular filtration rate; POAF, postoperative atrial fibrillation.

Supplementary table 5. Comparison of POAF, CHA2DS2-VASc, and AFRI Scores between two patient groups.

|  | Overall | Non-AF | New-onset AF | P |
| --- | --- | --- | --- | --- |
|  | n= 8367 | n= 8273 | n= 94 |
| POAF sore | 0 (0-1) | 0 (0-1) | 1 (0-1) | <0.001 |
| CHA2DS2-VASc score | 3 (2-3) | 3 (2-3) | 3 (2-4) | 0.012 |
| AFRI | 1 (0-2) | 1 (0-2) | 1 (1-2) | 0.008 |

AF, atrial fibrillation.


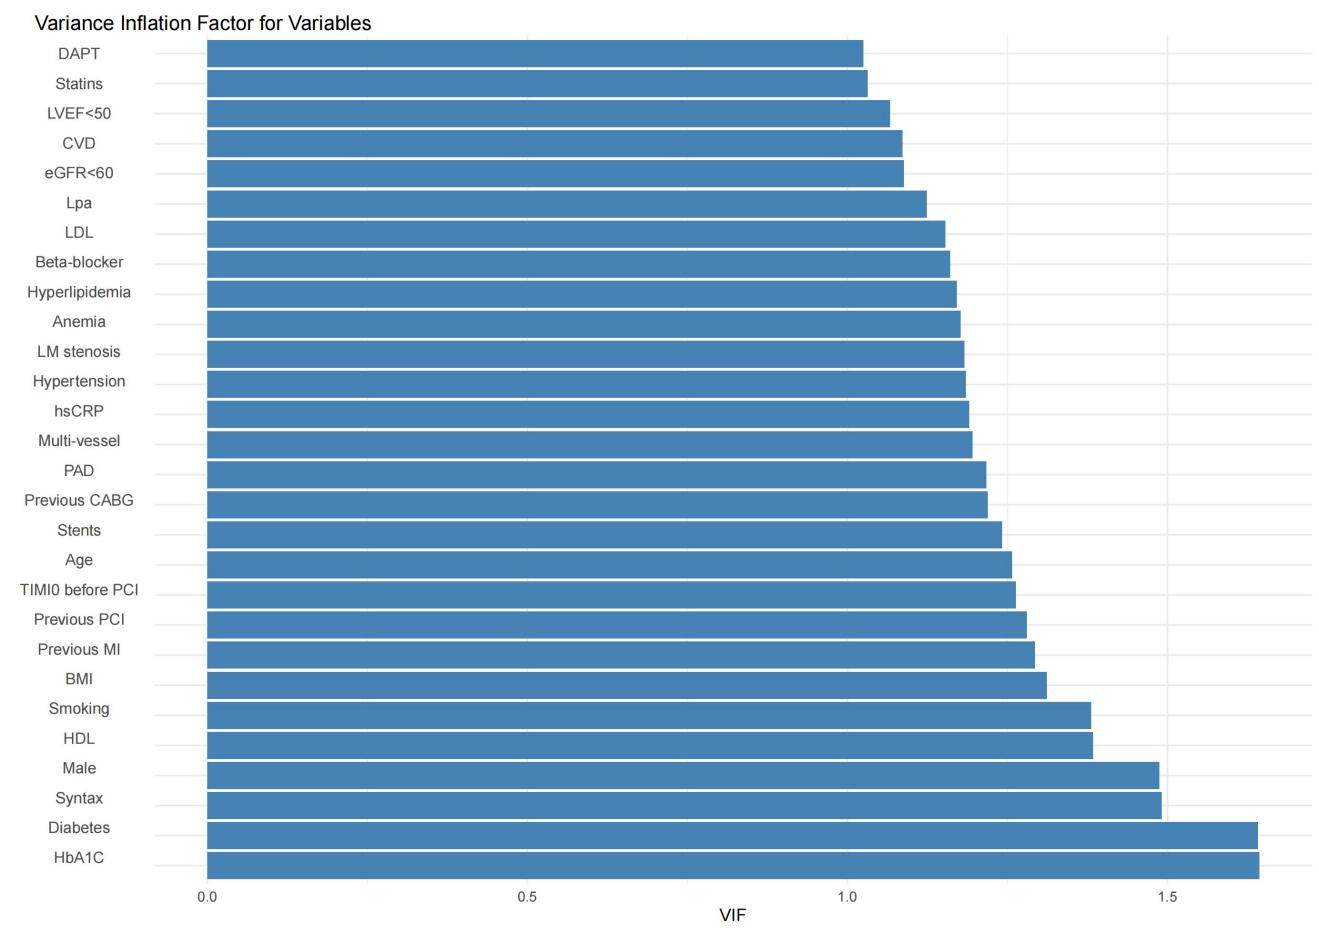


Supplementary figure 1. The variance inflation factors for variables with P < 0.2 in the univariate Cox regression.


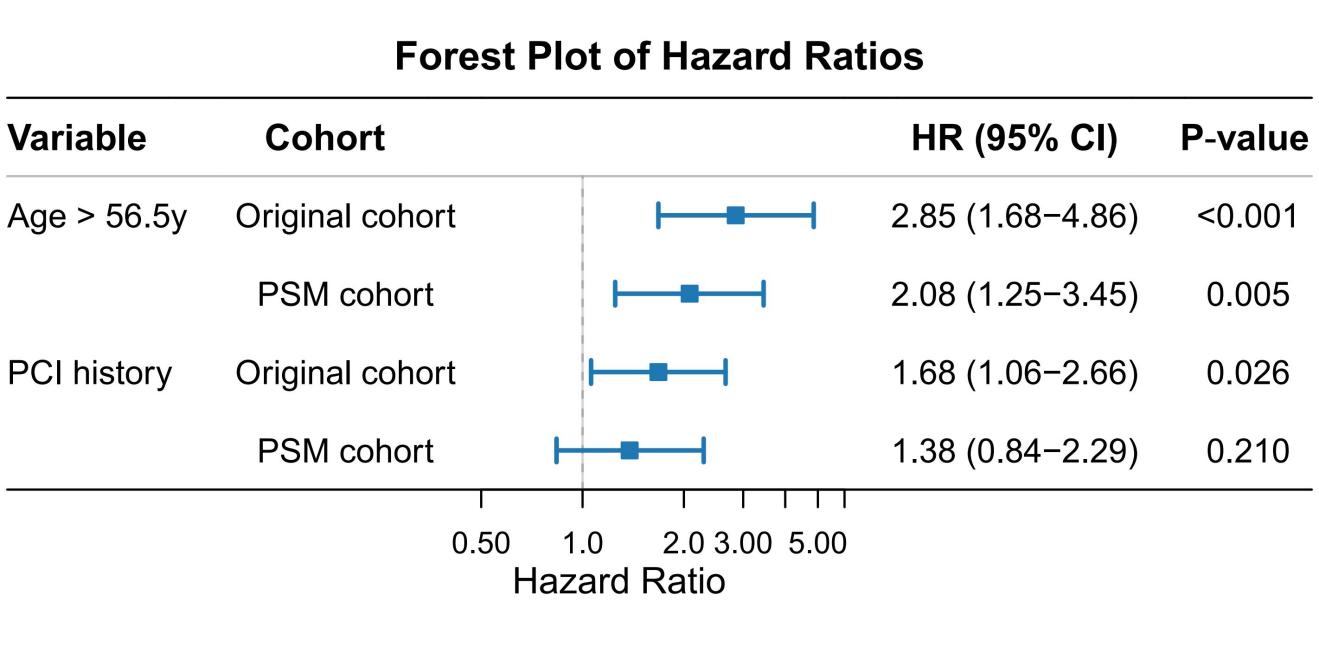


Supplementary figure 2. Association between age > 56.5 years old, PCI history, and new-onset atrial fibrillation in the competing risk model.
